# Supplementary material
Source: PubMed Central journal article supplement (PMC8478839)

## Supplemental Methods

**Table S1: Antibodies used for Western blotting**

| Primary antibody                  | Made in             | Manufacturer | Part number | Dilution | Visualized with/Secondary antibody (dilution)                                                      | Expected MW (kDa) | Observed MW (kDa) |
|-----------------------------------|---------------------|--------------|-------------|----------|----------------------------------------------------------------------------------------------------|-------------------|-------------------|
| Anti-NMDAR1 Antibody              | Rabbit (monoclonal) | Millipore    | AB9864      | 1:2,000  | IRDye 680RD Donkey anti-Rabbit IgG Secondary Antibody (1:20,000; 926-68073 from LICOR Biosciences) | 120               | 112*              |
| Anti-GluR1 Antibody               | Rabbit (polyclonal) | Millipore    | ABN241      | 1:1,000  | IRDye 680RD Donkey anti-Rabbit IgG Secondary Antibody (1:20,000; 926-68073 from LICOR Biosciences) | 110               | 170*              |
| Anti-GluR2 Antibody, clone L21/32 | Mouse (monoclonal)  | Millipore    | MABN71      | 1:5,000  | IRDye 800CW Donkey anti-Mouse IgG Secondary Antibody (1:15,000; 926-32212 from LICOR Biosciences)  | ~96               | 96, 170*          |

\*denotes specific band quantified for analysis to determine effect of age and association with set-shifting performance as described in Results

**Table S2: Correlations among GluR1 and GluR2 bands**

|                 |                   | GluR1 (@ 170 kDa) | GluR2 (@ 170 kDa) | GluR2 (@ 96 kDa) |
|-----------------|-------------------|-------------------|-------------------|------------------|
| <b>All Rats</b> | GluR1 (@ 170 kDa) | 1                 | .967**            | .946**           |
|                 | GluR2 (@ 170 kDa) | .967**            | 1                 | .938**           |
|                 | GluR2 (@ 96 kDa)  | .946**            | .938**            | 1                |
| <b>Young</b>    | GluR1 (@ 170 kDa) | 1                 | .975**            | .945**           |
|                 | GluR2 (@ 170 kDa) | .975**            | 1                 | .930**           |
|                 | GluR2 (@ 96 kDa)  | .945**            | .930**            | 1                |
| <b>Aged</b>     | GluR1 (@ 170 kDa) | 1                 | .972**            | .960**           |
|                 | GluR2 (@ 170 kDa) | .972**            | 1                 | .941**           |
|                 | GluR2 (@ 96 kDa)  | .960**            | .941**            | 1                |

\*\*p<0.01

**Fig. S1: NR1 immunoblot**

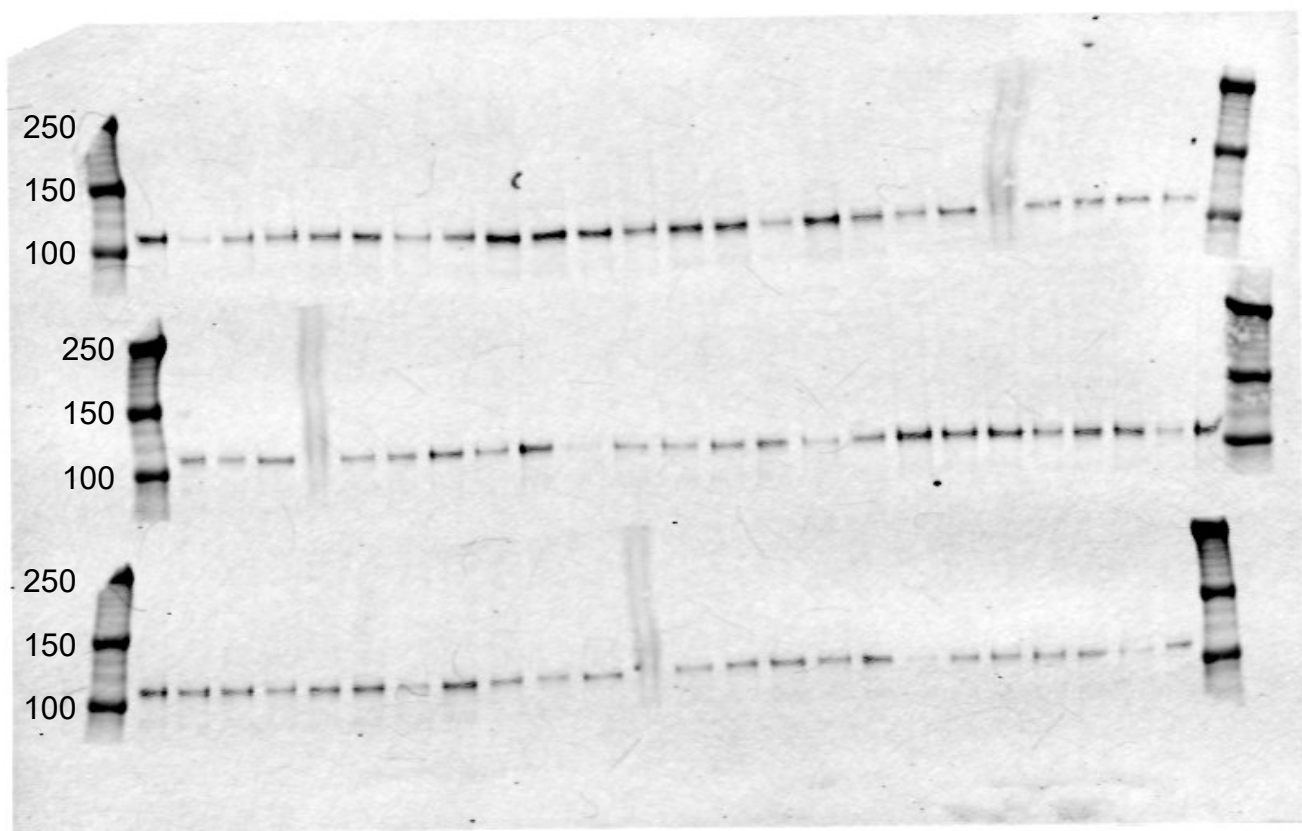

**Fig. S2: GluR1 immunoblot**

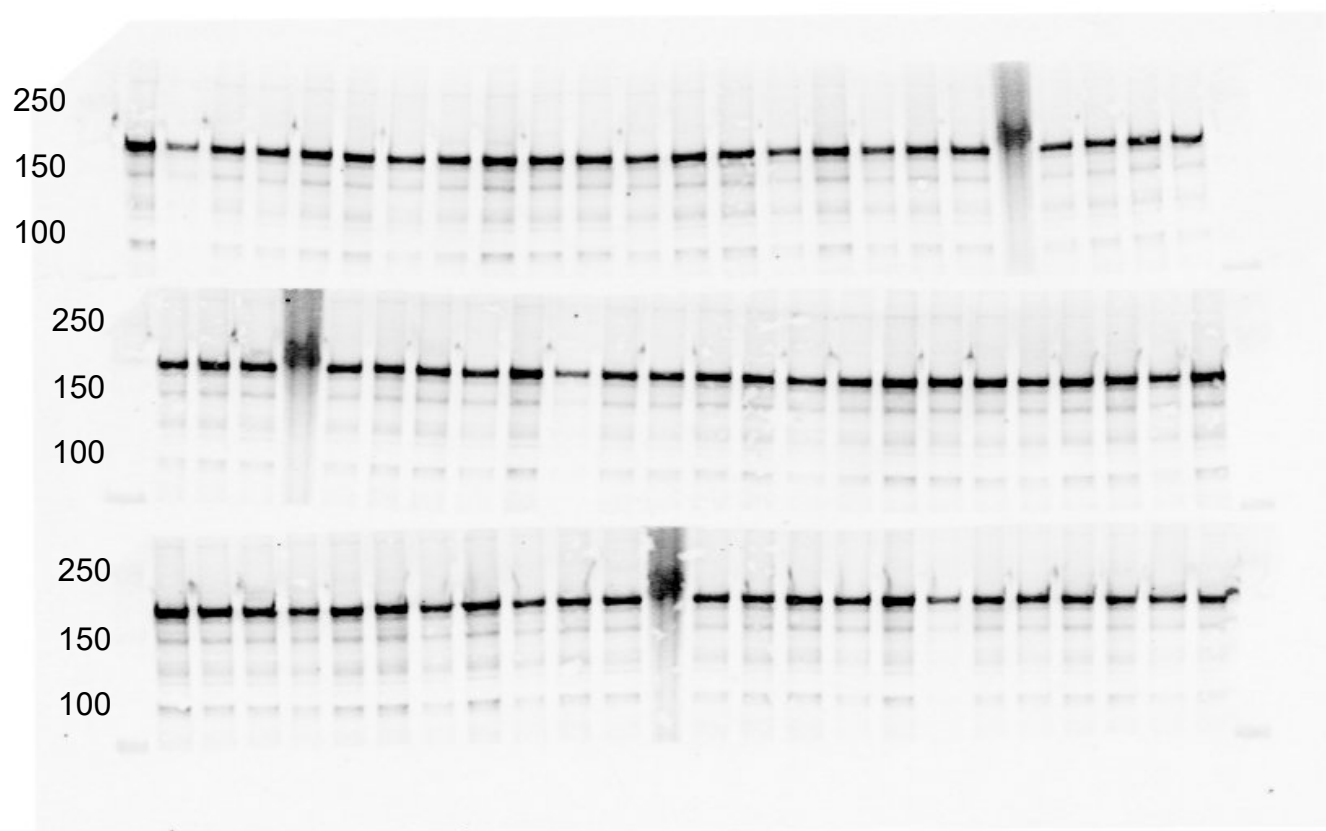

**Fig. S3: GluR2 immunoblot**

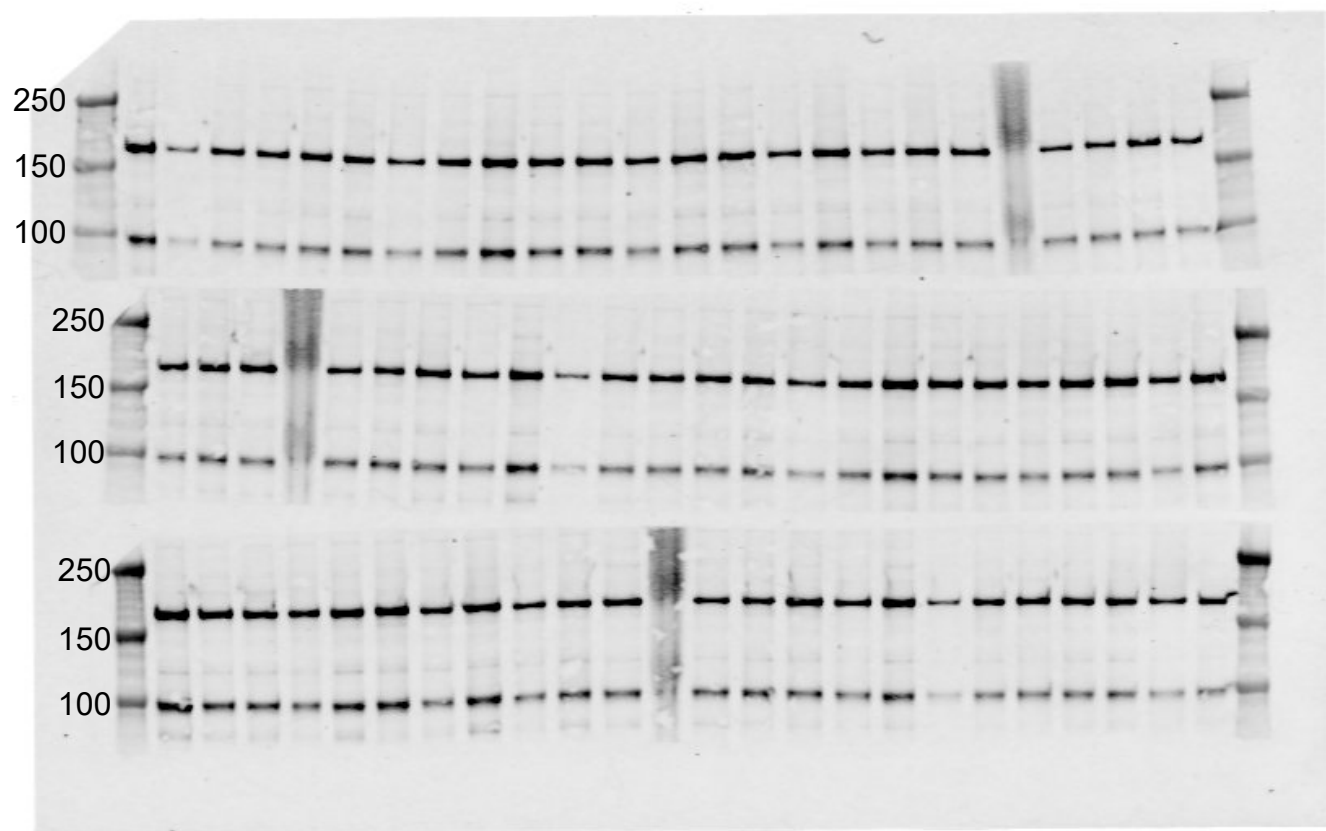

**Fig. S4: Merged channels of GluR1/GluR2 immunoblot**

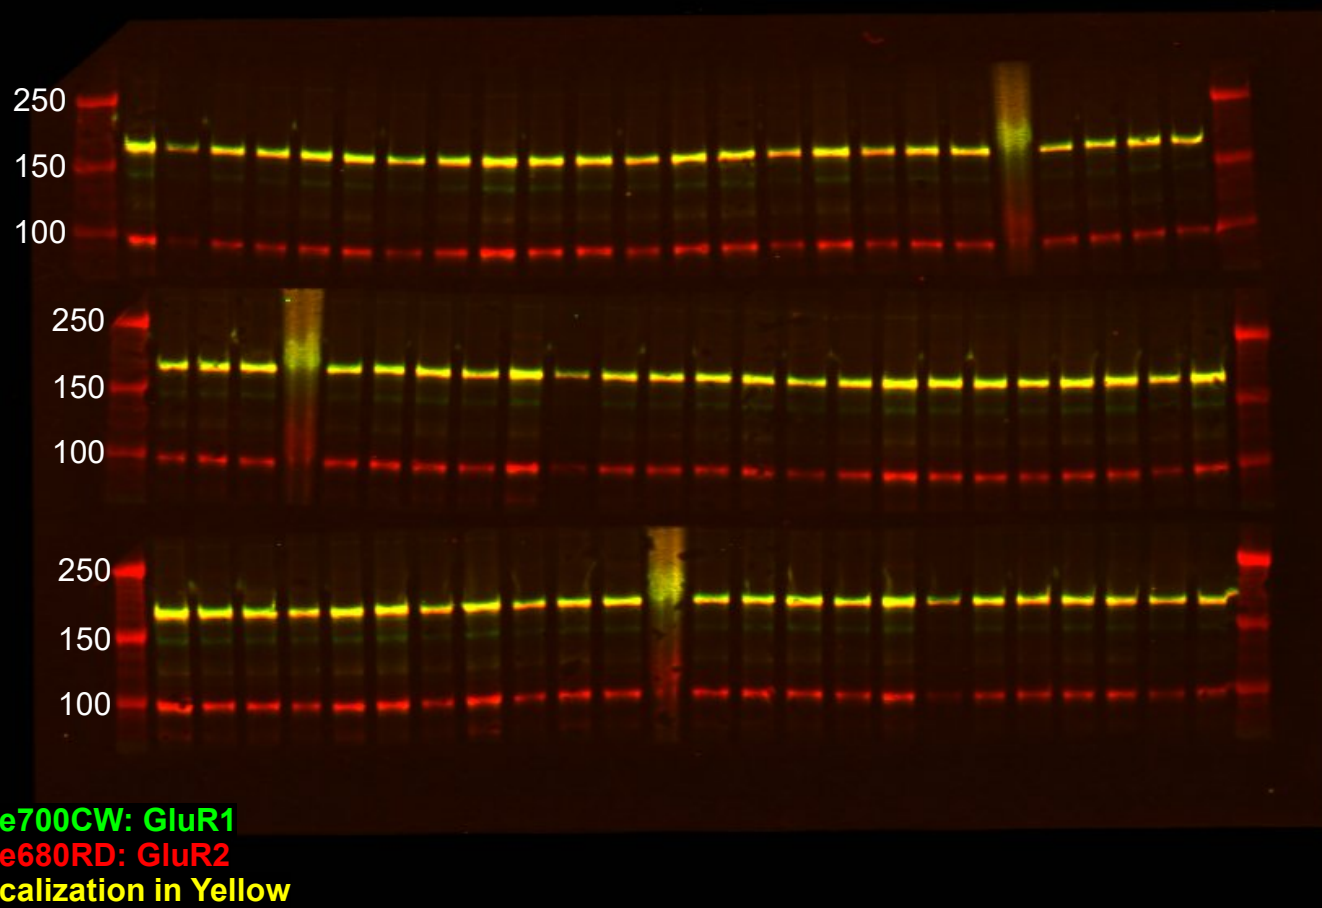

**Fig S5: Tubulin immunoblot #1**

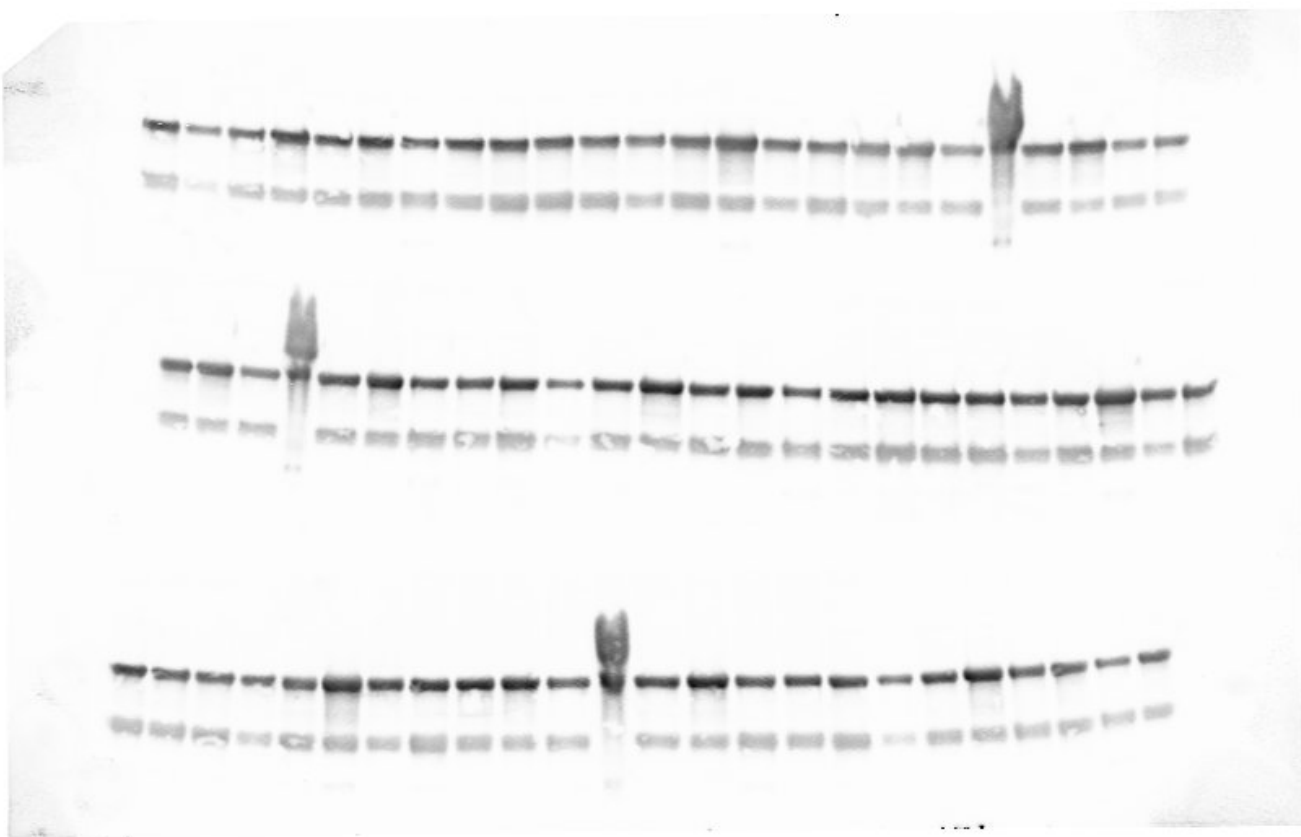

**Fig S6: Tubulin immunoblot #2**

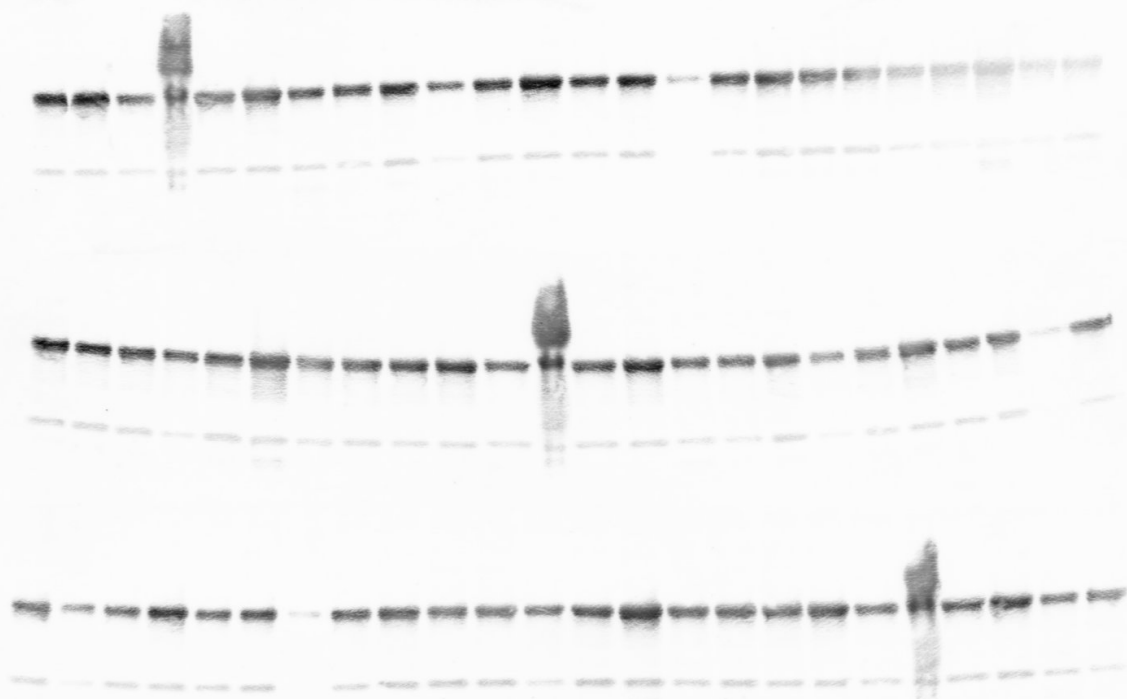

Supplement: NIHMS1730418-supplement-1.pdf [file NIHMS1730418-supplement-1.pdf]
